# Supplementary material for: Genome-Wide Metabolic Reconstruction of the Synthesis of Polyhydroxyalkanoates from Sugars and Fatty Acids by Burkholderia Sensu Lato Species
Source: MDPI journal article supplement (doi:10.3390/microorganisms9061290), 2021-06-12
Supplement: s1 [file s1]

## Supplementary Material

### Supplementary Table

Table S1. Assimilation of substrates commonly used for PHA production in 37 *Burkholderia* sensu lato type and representative strains.

| Strain                                                     | Substrate assimilation |     |     |     |     |     |     |     | Reference |
|------------------------------------------------------------|------------------------|-----|-----|-----|-----|-----|-----|-----|-----------|
|                                                            | Scr                    | Man | Glu | Fru | Xyl | Ara | Gln | Gly |           |
| <i>Burkholderia cepacia</i> ATCC 25416 <sup>T</sup>        | +                      | +   | +   | +   | +   | +   | +   | +   | [1]       |
| <i>Burkholderia contaminans</i> MS14                       | nr                     | nr  | nr  | nr  | nr  | nr  | nr  | nr  | -         |
| <i>Burkholderia cenocepacia</i> J2315                      | +                      | +   | +   | nr  | +   | nr  | nr  | nr  | [2]       |
| <i>Burkholderia stabilis</i> ATCC BAA-67 <sup>T</sup>      | -                      | +   | +   | nr  | nr  | +   | nr  | nr  | [3]       |
| <i>Burkholderia pyrrocinia</i> DSM 10685 <sup>T</sup>      | +                      | nr  | nr  | +   | nr  | +   | nr  | nr  | [4]       |
| <i>Burkholderia vietnamiensis</i> LMG 10929 <sup>T</sup>   | +                      | +   | +   | +   | +   | +   | nr  | +   | [5]       |
| <i>Burkholderia ambifaria</i> AMMD <sup>T</sup>            | nr                     | +   | +   | nr  | +   | +   | +   | nr  | [6]       |
| <i>Burkholderia stagnalis</i> LMG 28156 <sup>T</sup>       | +                      | +   | nr  | nr  | +   | +   | nr  | nr  | [7]       |
| <i>Burkholderia multivorans</i> ATCC 17616                 | -                      | +   | +   | +   | +   | +   | -   | +   | [2,8]     |
| <i>Burkholderia thailandensis</i> E264 <sup>T</sup>        | nr                     | nr  | nr  | nr  | nr  | +   | nr  | +   | [9,10]    |
| <i>Burkholderia mallei</i> ATCC 23344 <sup>T</sup>         | +                      | +   | +   | -   | -   | -   | +   | +   | [5,9,11]  |
| <i>Burkholderia glumae</i> LMG 2196 <sup>T</sup>           | +                      | +   | +   | +   | +   | +   | +   | -   | [1]       |
| <i>Burkholderia plantarii</i> ATCC 43733 <sup>T</sup>      | -                      | +   | +   | +   | +   | +   | nr  | +   | [1]       |
| <i>Paraburkholderia graminis</i> PHS1                      | +                      | nr  | nr  | +   | nr  | +   | nr  | nr  | [4]       |
| <i>Paraburkholderia caledonica</i> PHRS4                   | -                      | nr  | +   | +   | +   | +   | nr  | nr  | [6]       |
| <i>Paraburkholderia aromaticivorans</i> BN5 <sup>T</sup>   | +                      | +   | +   | +   | nr  | +   | +   | +   | [12]      |
| <i>Paraburkholderia xenovorans</i> LB400 <sup>T</sup>      | -                      | +   | +   | +   | +   | -   | +   | nr  | [13]      |
| <i>Paraburkholderia phytofirmans</i> PsJN <sup>T</sup>     | +                      | nr  | +   | +   | +   | nr  | nr  | nr  | [14]      |
| <i>Paraburkholderia fungorum</i> ATCC BAA-463 <sup>T</sup> | -                      | nr  | +   | +   | +   | +   | nr  | nr  | [6]       |

|                                                             |    |    |    |    |    |    |    |    |        |
|-------------------------------------------------------------|----|----|----|----|----|----|----|----|--------|
| <i>Paraburkholderia caffeinilytica</i> CF1 <sup>T</sup>     | -  | -  | -  | +  | +  | +  | -  | +  | [15]   |
| <i>Paraburkholderia sprengelii</i> WSM5005 <sup>T</sup>     | nr | +  | +  | nr | nr | +  | +  | nr | [13]   |
| <i>Paraburkholderia megapolitana</i> LMG 23650 <sup>T</sup> | +  | +  | +  | nr | nr | +  | +  | nr | [8,13] |
| <i>Paraburkholderia terrae</i> DSM 17804 <sup>T</sup>       | -  | +  | +  | nr | nr | +  | +  | nr | [16]   |
| <i>Paraburkholderia hospita</i> DSM 17164 <sup>T</sup>      | -  | +  | +  | nr | -  | +  | +  | nr | [13]   |
| <i>Paraburkholderia phymatum</i> STM 815 <sup>T</sup>       | nr | +  | +  | nr | nr | +  | +  | nr | [13]   |
| <i>Paraburkholderia sacchari</i> LMG 19450 <sup>T</sup>     | +  | +  | +  | +  | +  | +  | +  | +  | [4]    |
| <i>Paraburkholderia tropica</i> LMG 22274 <sup>T</sup>      | -  | +  | +  | +  | +  | +  | +  | +  | [13]   |
| <i>Caballeronia sordidicola</i> LMG 22029                   | -  | +  | +  | -  | nr | +  | +  | -  | [17]   |
| <i>Caballeronia udeis</i> LMG 27134 <sup>T</sup>            | -  | +  | +  | +  | nr | +  | +  | -  | [17]   |
| <i>Caballeronia glathei</i> LMG:14190 <sup>T</sup>          | -  | +  | +  | +  | nr | +  | +  | -  | [17]   |
| <i>Caballeronia insecticola</i> RPE64 <sup>T</sup>          | nr | +  | +  | nr | nr | +  | +  | nr | [18]   |
| <i>Caballeronia cordobensis</i> LMG 27620 <sup>T</sup>      | -  | +  | nr | nr | nr | nr | +  | nr | [19]   |
| <i>Caballeronia grimmiae</i> LMG 27580 <sup>T</sup>         | nr | +  | +  | nr | nr | +  | +  | nr | [13]   |
| <i>Trinickia caryophylli</i> LMG 2155 <sup>T</sup>          | +  | -  | +  | +  | +  | +  | nr | +  | [1]    |
| <i>Trinickia symbiotica</i> JPY-345 <sup>T</sup>            | nr | +  | +  | +  | nr | +  | nr | nr | [20]   |
| <i>Mycetohabitans rhizoxinica</i> HKI 454 <sup>T</sup>      | nr | nr | -  | nr | nr | nr | nr | +  | [20]   |
| <i>Robbsia andropogonis</i> LMG 2129 <sup>T</sup>           | -  | +  | nr | +  | nr | +  | nr | nr | [21]   |

---

Substrates claimed to be assimilated (+) or not (-) and those not found in literature (not reported: nr). Scr: sucrose; Man: mannitol; Glu: *D*-glucose; Fru: *D*-fructose; Xyl: *D*-Xylose; Ara: *L*-Arabinose; Gln: Gluconate; Gly: glycerol.

## Supplementary Figures

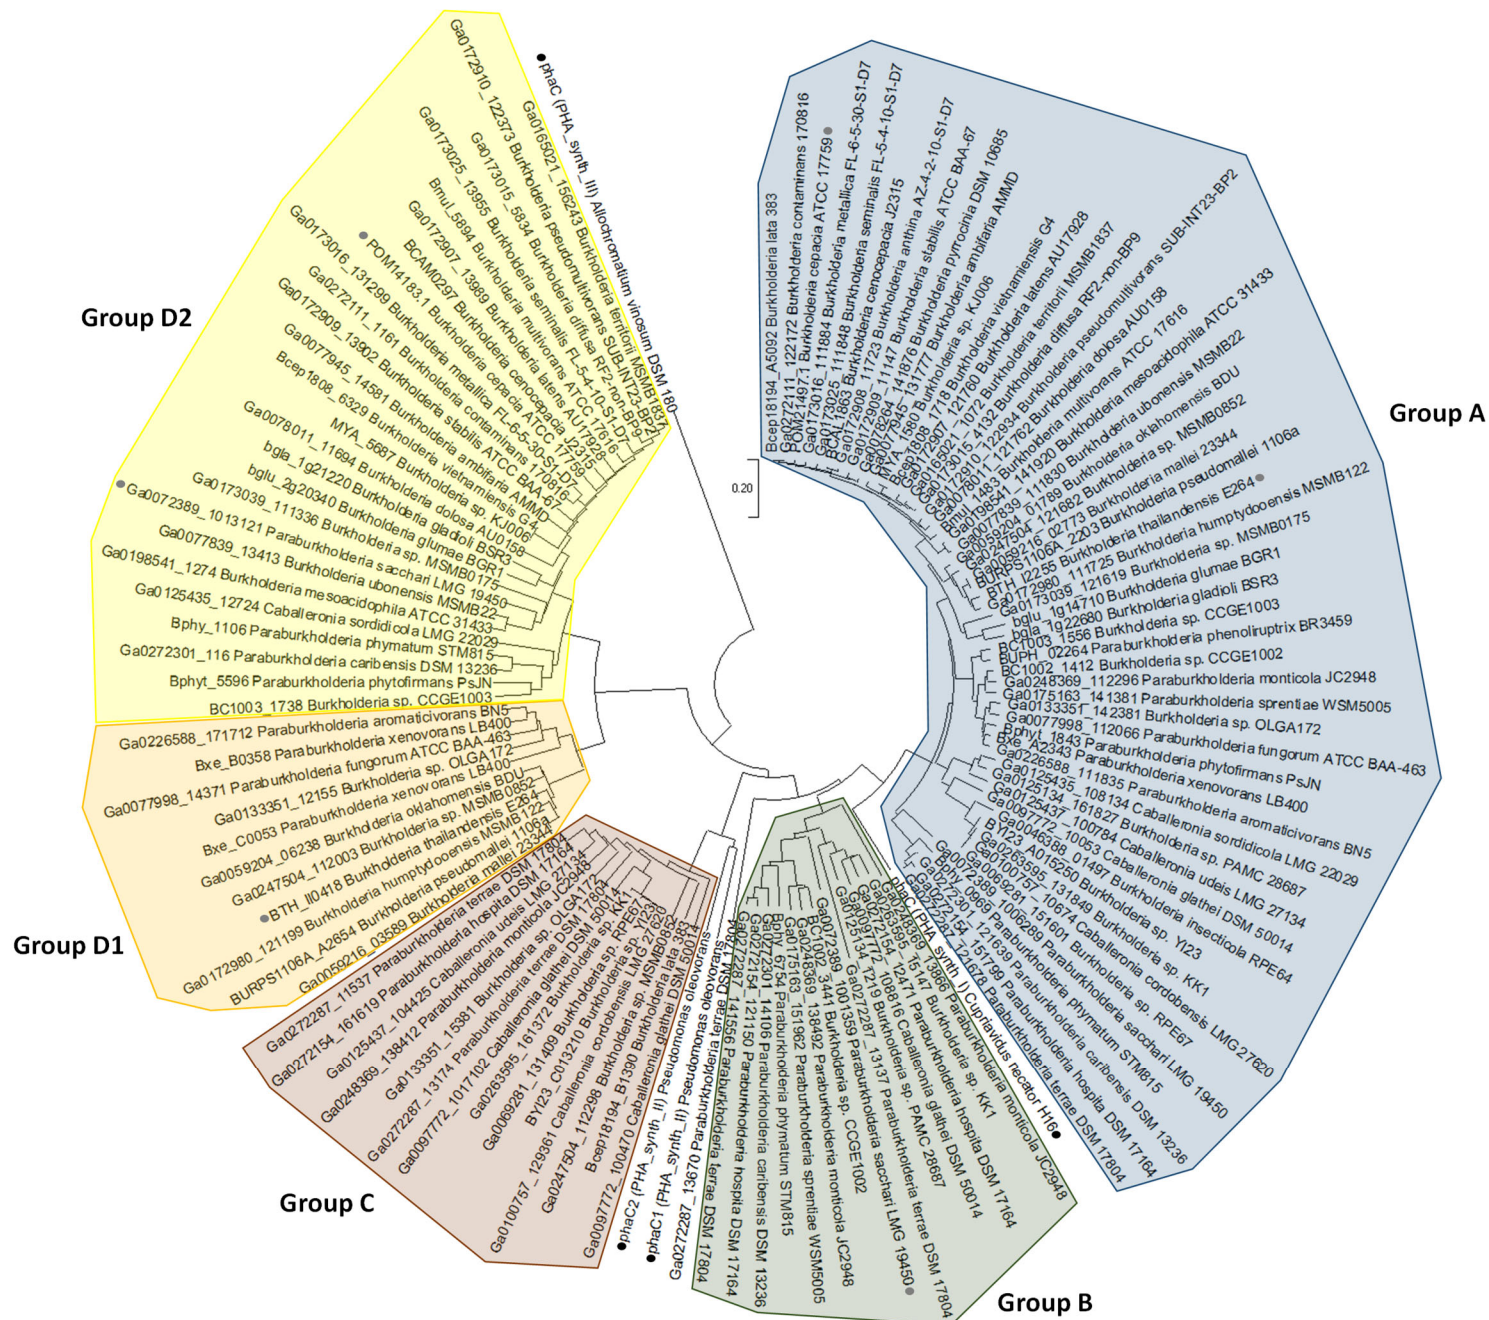

**Supplementary Figure 1. Phylogenetic tree for PhaC of representative *Burkholderia sensu lato* species.** The phylogenetic tree was obtained by the neighbor joining method using MEGA-X software based on sequence alignments calculated by CLUSTALW. PhaC sequences were retrieved from IMG/M database considering similarity by the chance expectation values and scores of BLAST probing. Confidence in phylogenetic inference was assessed using non-parametric bootstrap resampling.



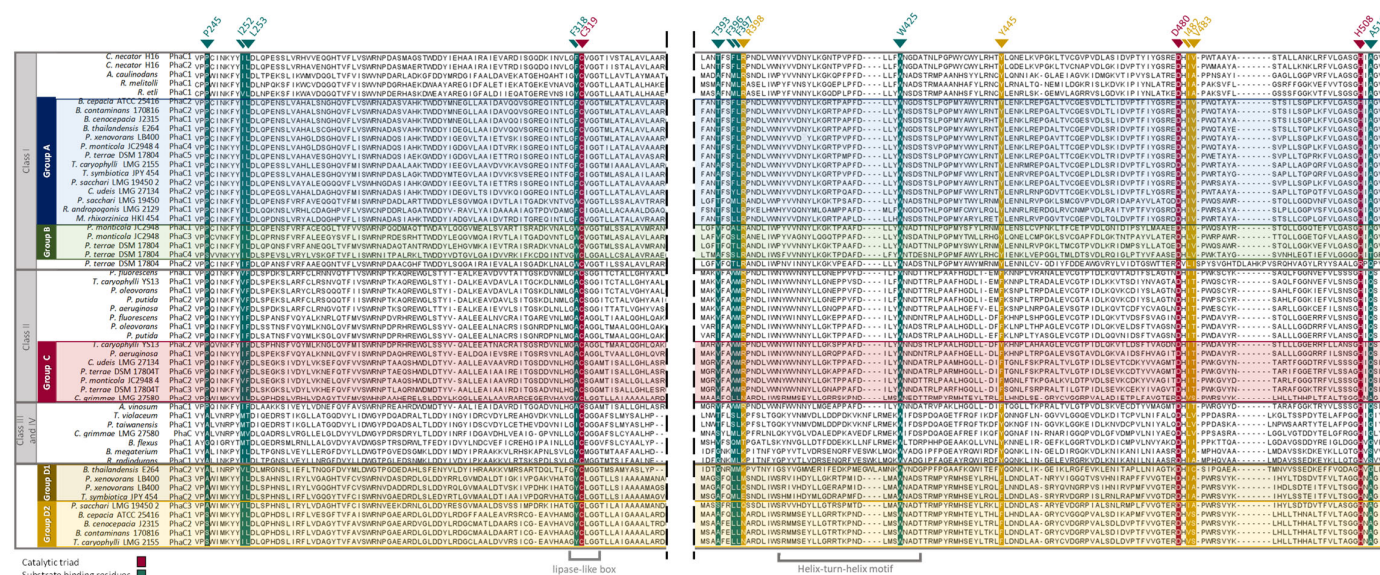

**Supplementary Figure 2. Multiple sequence alignment of PHA synthases of four phylogenetic groups in *Burkholderia sensu lato* genomes.** The conserved amino acidic residues and the lipase box-like identified in PHA synthases sequences are highlighted. PHA synthases of class I, II, III and IV are included as reference. The alignment was made using MAFFT.

>CP039287.1:c1498517-1498218 *Cupriavidus necator* H16

GGGCGCGGGCAATCCGCGATGGTAGACCCCTGCATGGCCCTCGCCGAGCGCCCCGGAGTGGC  
 GTCACAGCCGCTCCCGTGTATCGCCAGCAACGTTGTTTGTGCA**TTGCACAAAATCCA**CTTGACA  
**TTGGATCTGCGCCCC****TAAATAGGAATGTTTTCGGCG**CACCAATAAGAAATGCGCCTTGACC  
 CACCCAACGCCTGGGCTGGCCGAATCGGGCACAACACCGTACAGGCCCTGACATCTAGGCGGCT  
 TAATTTGCTAGACCTTGAAGTTCACCACTGGAGACCAGCA**ATG**

>CP000270.1:3203820-3204119 *Paraburkholderia xenovorans* LB400

GCCCATCTAGCGGTAATAAACCGACAAATATGTGCGACCAGCACGGTGCAACGCGGAAATTGAT 28  
CTGCGTCACATGAACGTCATGCCAACGCATAACGTCTTGTTTTATCAGTAGTTTCTTAATATG 29  
GTGCGACGCACAAAAAGGACTTGACATTGGTGACGCCATCCTAAAAATGGGAACCATGCTGC 30  
GATGCACAAAACATCGCGGTCCGGCGGGGCGCATCACTATCAATGTGTCTCACCCTCACCCAA 31  
TGCGGTCCGCACAGACAGACCGCGATCCAGGAGCGTAAACCATG 32  
>JTDB02000008.1:c192093-191794 *Paraburkholderia sacchari* LMG 33  
19450 34  
TGCGCTTGACGTTGTGCGACAAAGCCTCGCCGCACGCAGGCTTCAGACGCTATGCCGCAGATCG 35  
TCAAATCTGACAAATGACCTCATACACCTCATGCTTGACGCATAAGTAATTGTTTAAATAAAGC 36  
TTAATGTAATTGTGCGTCGCACAAAAGTTCTTGACATTCTCCGGCGACCTAAAAATCGAGA 37  
TCAATGCTGCACGACACAAAGCGCCGGGCGAGATTCCCCAAGAGTCTTGCCACTTACTTCAGG 38  
CGGCCCACGAACGAGGCCGCCAAACATCCAGGAGCGTAAACCATG 39  
>CP000868.1:c1255064-1254765 *Burkholderia multivorans* ATCC 17616 40  
AACGTTCCAGGCGCGTGC GCGGTTTACCTGCGCGCATCATGGTGCGCCGCGCGCCGGGCGCAG 41  
CGCCGTGCACCAGCGTGACACCCACTGAAACCGATTCCGGAACGCGGCGGTAAGCCGTTGTTT 42  
TGTCGATAATTTGTGCGTATTGTGCAATGCACAAAAAATGCTTGACAAGGTTTTTCTCTGCCCT 43  
AAAAATAGGCTCCATTGCTGCGTTGACAAAGCACGTCGCCGCAAGATTCCCCAGCGCAGTGCCC 44  
TTTACCCCGCATCGACGCGATCGCTTCCAGGAGCTTGACATG 45  
>CP009435.1:3550343-3550642 *Burkholderia glumae* LMG 2196 46  
AAACCCGCGATGGGCGCGCTTTGCCAAGGGCGTCGCGAGTCAGGCGCATCGAGCCGTCTCATGC 47  
AATGCCGCGGACCCGAACCGATTTTCATCCGGAACGATACAAGCCATTGTTTTTCCGGAATAAT 48  
AGTGTCAATTGTGACGCGCACAAAAGAGCTTGACATCTGTTTCGAACGCCCTAGAATGGGAACC 49  
GTTGTTGCAATGCACCACGGCATTGCGCAGATTCCGAACACCGTCGTGCCCTTAACCTCAAGCG 50  
ATCGCCGCGAAGCCGGCGATCGTCAATCAGGAGCCAAAATCATG 51  
52  
53  
>JFHE01000079.1:6667-6966 *Caballeronia grimmiae* LMG 27580 54  
CAACATGCGCCAACGCAGCCGCGCGCAGCATGGGACTCGCCGCTTTTCGCTAGTCCACGTCGGT 55  
GCATGCGCCGCCCGGTTACGCCCCTTCCGACCGAATGCCGTAGTTAAACTCTTGTTTAAACAAG 56  
GGTTTCCCTATTTGTGCATTGCACAAAAGCGCTTGACATCGATCGGAATATCTCTAAAAATGG 57  
GCTTCATGTTGCAACGCACCAATCCGGAGCTGCACCATCTGGCAGCAAGTTGCTGCATCTACCA 58  
AACTACGACCCGCGATGATGGGTGCGCATAAGGAGCCTGAGATG 59  
>FCOK02000074.1:c21237-20938 *Caballeronia udeis* LMG 27134 60  
CCGGACTTGGGATCCTAGCATCGACACCGCCTGCGTTCTCCGCCCCAAGCTGGTGCACCGTATC 61  
TCGAAATGTAGTTCCACTACAAAGAAGTGTCTCGTAAGCCATTGTTTAAATAAGCATTCGTACG 62  
ATGTTGCGTCGCACAAAAGAGCGCTTGACATCTATCGGAATATGCCTAGAATAGGCTCCATGTT 63  
GCGACGCACCAATAGCTGATCGCCTCATACGTTTCCGGATTTCGGTCTCCGCCAAAACCCAC 64  
GACCCGCGCTGATGATGGGTGCAATCTTTCAGGAGCGTGACATG 65  
>VJZF01000001.1:c156642-156343 *Trinickia caryophylli* DSM 50341 66  
AGGAAGGCCGCCATCGAAGGGTCCGTCGCCCTTTTACGCGCGACGCAGCAAAATCCATTCCAAGC 67  
GCCCTTCGCCGCTGCCCTACCATTCCCTCGTAGCACCTTGTTTTTATGCAGAATCCTTTGAATTA 68  
GACAGAATTGTGCATCGCACCAAACAGCGCTTGACTTTTGTGCACGACGGCATAGAATAGGTCT 69

```

CGATGTTGCGACGCACAAAAGGCGTCGGGCATACGACGCGATTCTGAAGCTTTGCCATTAAACCTA
TGCATCTGCGCCAGACAGGTCGATTTTCAGGAGCGAAAACATG
>PTIR01000018.1:c93163-92864 Trinickia symbiotica JPY-345
GGCGGGAGCGTGGGCGCGATCGTATCACGAGACTGGTGCACGAGGGCGAAGCACTGCCGCATTT
TTTCCCGAAAGCGAGCGTTTGCTCGGCCAAAATTACCGTCATGCCGTTGTTTTTACGTGGAAA
CCCTAACATTGTGCAATGCACAAAAATCGCGTTGACATTTGGTCAAGTGAGCCTAAAAATAGGAT
CCGTTGTTGCGACGCACAAAACGCGTCGGCTAGACGACGCGATCAAAGTTTTGCCATTCCACCC
CCCGGTCTGCGCCAGACAGGCCGACTATCAGGAGCGAAAACATG

```

**Supplementary Figure 3. Conserved motif in the putative promoter sequence of the *phaP* gene in 8 selected *Burkholderia sensu lato* strains and the model PHA-producer *C. necator* H16.** The 300 bp *phaP* upstream regions, containing putative regulatory sequences, were recovered from 8 genomes of *Burkholderia* s.l. strains, including two species per main genera (*Burkholderia*, *Paraburkholderia*, *Caballeronia* and *Trinickia*), and from *C. necator* H16 genome, in which the repression of *phaP* expression by the PhaR regulator has been reported [22], and altogether used for a consensus motif search. The web-based MEME suite of motif-based sequence analysis tools version 5.3.3 [23] was used for motif discovery utilizing standard settings. The logo and consensus sequence of a 57 bp-motif identified in the nine putative regulatory regions included is shown in the top. The 300 bp *phaP* upstream region of each strain is also shown including every motif (in color) and the ATG initiation codon of each gene (in bold inside the box). The PhaR binding sites determined by DNase I footprinting experiments in *C. necator* H16 [22] are also shown in gray boxes. The accession numbers and coordinates of each sequence are included in the header of the fasta format

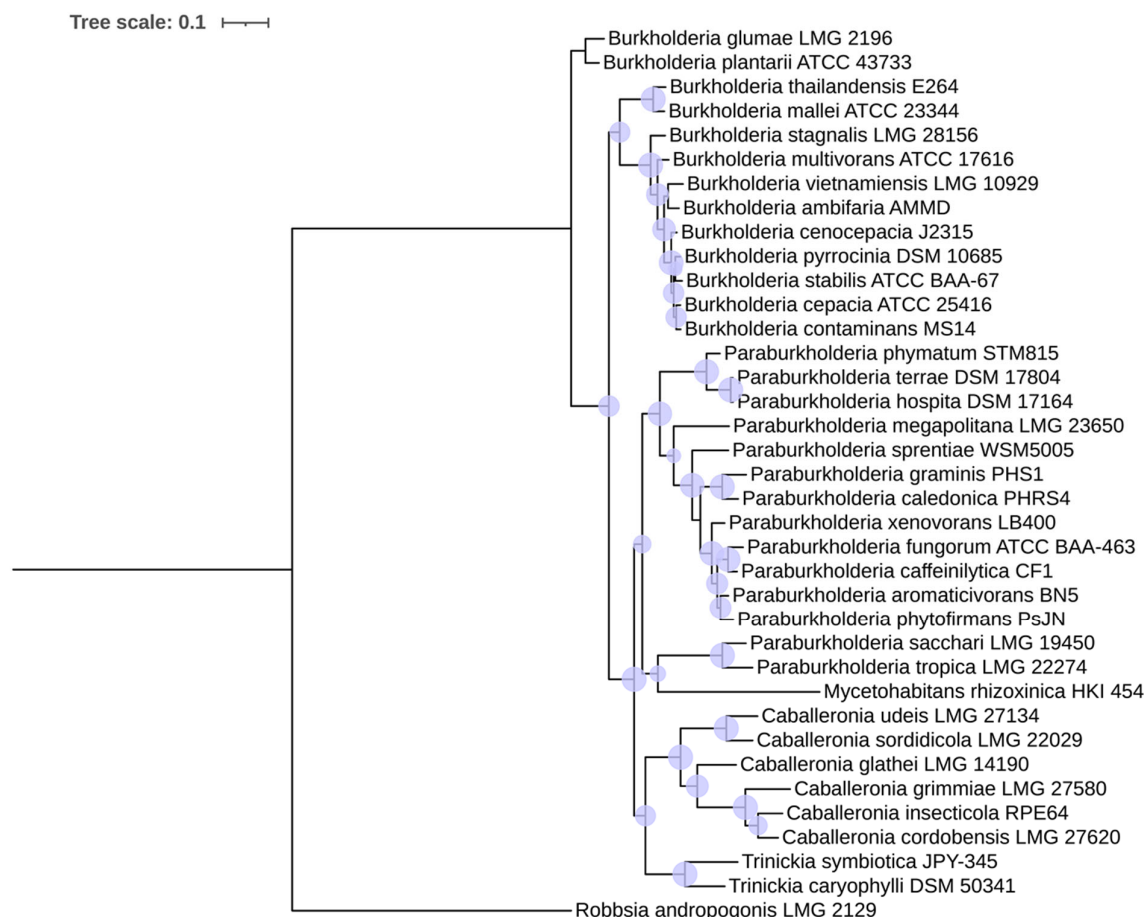

91

**Supplementary Figure 4. Evolutionary relationships among concatenated PhaA, PhaB and PhaC protein homologues encoded by the conserved canonical *phaCAB* gene cluster of the 37 *Burkholderia sensu lato* genomes.** Maximum likelihood (ML) topology provided by IQ-TREE [24] employing ModelFinder as model-selection method [25] and Ultrafast Bootstrap Approximation as bootstrap approach [26] with the -m TEST, -bb 1000 and -alrt 1000 options. Sequence alignments for phylogenetic reconstruction were calculated with MAFFT online service using Auto (FFT-NS-1, FFT-NS-2, FFT-NS-i or L-INS-i; depends on data size) strategy [27]. ML topology is shown with SH-like approximate likelihood ratio support values (n = 1000) given at each node (values >50% are shown). Visualization and edition of phylogenetic trees were performed by the Interactive Tree Of Life (iTOL) online tool [28]

92

93

94

95

96

97

98

99

100

## References

1. Urakami, T.; Ito-Yoshida, C.; Araki, H.; Kijima, T.; Suzuki, K.-I.; Komagata, K. Transfer of *Pseudomonas plantarii* and *Pseudomonas glumae* to *Burkholderia* as *Burkholderia* spp. and description of *Burkholderia vandii* sp. nov. *Int. J. Syst. Bacteriol.* **1994**, *44*, 235–245, doi:10.1099/00207713-44-2-235.
2. Vandamme, P.; Holmes, B.; Vancanneyt, M.; Coenye, T.; Hoste, B.; Coopman, R.; Revets, H.; Lauwers, S.; Gillis, M.; Kersters, K.; et al. Occurrence of multiple genomovars of *Burkholderia cepacia* in cystic fibrosis patients and proposal of *Burkholderia multivorans* sp. nov. *Int. J. Syst. Bacteriol.* **1997**, *47*, 1188–1200, doi:10.1099/00207713-47-4-1188.
3. Seth-Smith, H.M.; Casanova, C.; Sommerstein, R.; Meinel, D.M.; Abdelbary, M.M.; Blanc, D.S.; Droz, S.; Führer, U.; Lienhard, R.; Lang, C.; et al. Phenotypic and genomic analyses of *Burkholderia stabilis* clinical contamination, Switzerland. *Emerg. Infect. Dis.* **2019**, *25*, 1084–1092, doi:10.3201/eid2506.172119.

101

102

103

104

105

106

107

108

109

110

4. O Brämer, C.; Vandamme, P.; Da Silva, L.F.; Gomez, J.G.C.; Steinbüchel, A. Polyhydroxyalkanoate-accumulating bacterium isolated from soil of a sugar-cane plantation in Brazil. *Int. J. Syst. Evol. Microbiol.* **2001**, *51*, 1709–1713, doi:10.1099/00207713-51-5-1709. 111–113
5. Gillis, M.; Van Van, T.; Bardin, R.; Goor, M.; Hebbbar, P.; Willems, A.; Segers, P.; Kersters, K.; Heulin, T.; Fernandez-Fernandez, M.P. Polyphasic taxonomy in the genus *Burkholderia* Leading to an emended description of the genus and proposition of *Burkholderia vietnamiensis* sp. nov. for n<sub>2</sub>-fixing isolates from rice in Vietnam. *Int. J. Syst. Bacteriol.* **1995**, *45*, 274–289, doi:10.1099/00207713-45-2-274. 114–117
6. Coenye, T.; Laevens, S.; Willems, A.; Olén, M.; Hannat, W.; Govan, J.; Gillis, M.; Falsen, E.; Vandamme, P. *Burkholderia fungorum* sp. nov. and *Burkholderia caledonica* sp. nov., two new species isolated from the environment, animals and human clinical samples. *Int. J. Syst. Evol. Microbiol.* **2001**, *51*, 1099–1107, doi: 10.1099/00207713-51-3-1099. DOI: 10.1099/00207713-51-3-1099. 118–120
7. De Smet, B.; Mayo, M.; Peeters, C.; Zlosnik, J.; Spilker, T.; Hird, T.J.; Lipuma, J.J.; Kidd, T.; Kaestli, M.; Ginther, J.L.; et al. *Burkholderia stagnalis* sp. nov. and *Burkholderia territorii* sp. nov., two novel *Burkholderia cepacia* complex species from environmental and human sources. *Int. J. Syst. Evol. Microbiol.* **2015**, *65*, 2265–2271, doi:10.1099/ijis.0.000251. 121–123
8. Vandamme, P.; Opelt, K.; Knöchel, N.; Berg, C.; Schönmann, S.; De Brandt, E.; Eberl, L.; Falsen, E.; Berg, G. *Burkholderia bryophila* sp. nov. and *Burkholderia megapolitana* sp. nov., moss-associated species with antifungal and plant-growth-promoting properties. *Int. J. Syst. Evol. Microbiol.* **2007**, *57*, 2228–2235, doi:10.1099/ijis.0.65142-0. 124–126
9. Brett, P.J.; DeShazer, D.; Woods, D.E. Note: *Burkholderia thailandensis* sp. nov., a *Burkholderia pseudomallei*-like species. *Int. J. Syst. Bacteriol.* **1998**, *48*, 317–320, doi:10.1099/00207713-48-1-317. 127–128
10. Victor, I.U.; Kwienien, M.; Tripathi, L.; Cobice, D.; McClean, S.; Marchant, R.; Banat, I.M. Quorum sensing as a potential target for increased production of rhamnolipid biosurfactant in *Burkholderia thailandensis* E264. *Appl. Microbiol. Biotechnol.* **2019**, *103*, 6505–6517, doi:10.1007/s00253-019-09942-5. 129–131
11. Yabuuchi, E.; Kosako, Y.; Oyaizu, H.; Yano, I.; Hotta, H.; Hashimoto, Y.; Ezaki, T.; Arakawa, M. Proposal of *Burkholderia* gen. nov. and transfer of seven species of the genus *Pseudomonas* homology group ii to the new genus, with the type species *Burkholderia cepacia* (Palleroni and Holmes 1981) comb. nov. *Microbiol. Immunol.* **1992**, *36*, 1251–1275, doi:10.1111/j.1348-0421.1992.tb02129.x. 132–135
12. Lee, Y.; Jeon, C.O. *Paraburkholderia aromaticivorans* sp. nov., an aromatic hydrocarbon-degrading bacterium, isolated from gasoline-contaminated soil. *Int. J. Syst. Evol. Microbiol.* **2018**, *68*, 1251–1257, doi:10.1099/ijsem.0.002661. 136–137
13. Barberan, A.; International journal of systematic and evolutionary microbiology (IJSEM) phenotypic database. Figshare. Dataset. **2016**. doi: 10.6084/m9.figshare.4272392. (accessed 20 January 2021). 138–139
14. Sessitsch, A.; Coenye, T.; Sturz, A.V.; Vandamme, P.; Barka, E.A.; Salles, J.F.; Van Elsas, J.D.; Faure, D.; Reiter, B.; Glick, B.R.; et al. *Burkholderia phytofirmans* sp. nov., a novel plant-associated bacterium with plant-beneficial properties. *Int. J. Syst. Evol. Microbiol.* **2005**, *55*, 1187–1192, doi:10.1099/ijis.0.63149-0. 140–142
15. Gao, Z.; Yuan, Y.; Xu, L.; Liu, R.; Chen, M.; Zhang, C. *Paraburkholderia caffeinilytica* sp. nov., isolated from the soil of a tea plantation. *Int. J. Syst. Evol. Microbiol.* **2016**, *66*, 4185–4190, doi:10.1099/ijsem.0.001333. 143–144
16. Yang, H.-C.; Im, W.-T.; Kim, K.K.; An, D.-S.; Lee, S.-T. *Burkholderia terrae* sp. nov., isolated from a forest soil. *Int. J. Syst. Evol. Microbiol.* **2006**, *56*, 453–457, doi:10.1099/ijis.0.63968-0. 145–146
17. Vandamme, P.; De Brandt, E.; Houf, K.; Salles, J.F.; Van Elsas, J.D.; Spilker, T.; LiPuma, J.J. *Burkholderia humi* sp. nov., *Burkholderia choica* sp. nov., *Burkholderia telluris* sp. nov., *Burkholderia terrestris* sp. nov. and *Burkholderia udeis* sp. nov.: *Burkholderia glathei*-like bacteria from soil and rhizosphere soil. *Int. J. Syst. Evol. Microbiol.* **2013**, *63*, 4707–4718, doi:10.1099/ijis.0.048900-0. 147–149
18. Takeshita, K.; Tamaki, H.; Ohbayashi, T.; Meng, X.-Y.; Sone, T.; Mitani, Y.; Peeters, C.; Kikuchi, Y.; Vandamme, P. *Burkholderia insecticola* sp. nov., a gut symbiotic bacterium of the bean bug *Riptortus pedestris*. *Int. J. Syst. Evol. Microbiol.* **2018**, *68*, 2370–2374, doi:10.1099/ijsem.0.002848. 150–152
19. Draghi, W.O.; Peeters, C.; Cnockaert, M.; Snauwaert, C.; Wall, L.G.; Zorreguieta, A.; Vandamme, P. *Burkholderia cordobensis* sp. nov., from agricultural soils. *Int. J. Syst. Evol. Microbiol.* **2014**, *64*, 2003–2008, doi:10.1099/ijis.0.059667-0. 153–154
20. Santos, P.E.-D.L.; Palmer, M.; Chávez-Ramírez, B.; Beukes, C.; Steenkamp, E.T.; Briscoe, L.; Khan, N.; Maluk, M.; Lafos, M.; Humm, E.; et al. whole genome analyses suggests that *Burkholderia* sensu lato contains two additional novel genera (*Mycetohabitans* gen. nov., and *Trinickia* gen. nov.): implications for the evolution of diazotrophy and nodulation in the *Burkholderiaceae*. *Genes* **2018**, *9*, 389, doi:10.3390/genes9080389. 155–158
21. Lopes-Santos, L.; Castro, D.B.A.; Ferreira-Tonin, M.; Corrêa, D.B.A.; Weir, B.S.; Park, D.; Ottoboni, L.M.M.; Neto, J.R.; Destéfano, S.A.L. Reassessment of the taxonomic position of *Burkholderia andropogonis* and description of *Robbsia andropogonis* gen. nov., comb. nov. *Antonie van Leeuwenhoek* **2017**, *110*, 727–736, doi:10.1007/s10482-017-0842-6. 159–161
22. Pötter, M.; Madkour, M.H.; Mayer, F.; Steinbüchel, A. Regulation of phasin expression and polyhydroxyalkanoate (PHA) granule formation in *Ralstonia eutropha* H16. *Microbiology* **2002**, *148*, 2413–2426, doi:10.1099/00221287-148-8-2413. 162–163
23. Bailey, T.L.; Johnson, J.; Grant, C.E.; Noble, W.S. The MEME Suite. *Nucleic Acids Res.* **2015**, *43*, W39–W49, doi:10.1093/nar/gkv416. 164
24. Nguyen, L.-T.; Schmidt, H.A.; Von Haeseler, A.; Minh, B.Q. IQ-TREE: A fast and effective stochastic algorithm for estimating maximum-likelihood phylogenies. *Mol. Biol. Evol.* **2015**, *32*, 268–274, doi:10.1093/molbev/msu300. 165–166
25. Kalyanamoorthy, S.; Minh, B.Q.; Wong, T.K.F.; von Haeseler, A.; Jermini, L.S. ModelFinder: fast model selection for accurate phylogenetic estimates. *Nat. Methods* **2017**, *14*, 587–589. 167–168
26. Hoang, D.T.; Chernomor, O.; von Haeseler, A.; Minh, B.Q.; Vinh, L.S. UFBoot2: improving the ultrafast bootstrap approximation. *Mol. Biol. Evol.* **2018**, *35*, 518–522. 169–170



- 
27. Katoh, K.; Rozewicki, J.; Yamada, K.D. MAFFT online service: multiple sequence alignment, interactive sequence choice and visualization. *Briefings Bioinform.* **2019**, *20*, 1160–1166, doi:10.1093/bib/bbx108. 171  
172
28. Letunic, I.; Bork, P. Interactive Tree of Life (iTOL) v4: recent updates and new developments. *Nucleic Acids Res.* **2019**, *47*, W256–W259, doi:10.1093/nar/gkz239. 173  
174
